# Supplementary material for: Metabolites Associated With the Risk of Incident Venous Thromboembolism: A Metabolomic Analysis
Source: PubMed Central journal article supplement — J Am Heart Assoc. 2018 Nov 17;7(22):e010317. doi: 10.1161/JAHA.118.010317 (PMC6404443; doi:10.1161/jaha.118.010317), 2018-11-17

# **Supplemental Material**

**Table S1. The 211 named metabolites and their category.**

| Category                              | Metabolites                                                                                                                                                                                                                                                                                                                                                                                                                                                                                                                                                                                                                                                                                                                                                                                                                                                                                                             |
|---------------------------------------|-------------------------------------------------------------------------------------------------------------------------------------------------------------------------------------------------------------------------------------------------------------------------------------------------------------------------------------------------------------------------------------------------------------------------------------------------------------------------------------------------------------------------------------------------------------------------------------------------------------------------------------------------------------------------------------------------------------------------------------------------------------------------------------------------------------------------------------------------------------------------------------------------------------------------|
| Carnitine                             | C2 carnitine, C16 carnitine, C10 carnitine, C5 carnitine, C6 carnitine, C8 carnitine, C3 carnitine, C18 carnitine, C4 carnitine, C14:1 carnitine, C12 carnitine, C5:1 carnitine, C18:1 carnitine, C14 carnitine, C26 carnitine, C18:2 carnitine, C4-OH carnitine, C9 carnitine, C10:2 carnitine, C12:1 carnitine, C14:2 carnitine, carnitine                                                                                                                                                                                                                                                                                                                                                                                                                                                                                                                                                                            |
| Cholesteryl ester (CE)                | C18:2 CE, C16:1 CE, C16:0 CE, C18:1 CE, C14:0 CE, C20:4 CE, C20:5 CE, C22:6 CE, C20:3 CE, C18:0 CE, C18:3 CE, C22:5 CE                                                                                                                                                                                                                                                                                                                                                                                                                                                                                                                                                                                                                                                                                                                                                                                                  |
| Diacylglycerol (DAG)                  | C30:0 DAG, C32:0 DAG, C32:1 DAG, C34:1 DAG, C34:2 DAG, C32:2 DAG, C34:3 DAG, C38:5 DAG, C36:1 DAG, C36:2 DAG, C36:3 DAG, C36:4 DAG                                                                                                                                                                                                                                                                                                                                                                                                                                                                                                                                                                                                                                                                                                                                                                                      |
| Lysophosphatidylcholine (LPC)         | C18:1 LPC, C14:0 LPC, C16:0 LPC, C16:1 LPC, C18:0 LPC, C18:2 LPC, C20:4 LPC, C20:5 LPC, C22:6 LPC                                                                                                                                                                                                                                                                                                                                                                                                                                                                                                                                                                                                                                                                                                                                                                                                                       |
| Lysophosphatidylethanolamine (LPE)    | C18:0 LPE, C16:0 LPE, C18:1 LPE, C18:2 LPE, C20:4 LPE, C22:6 LPE                                                                                                                                                                                                                                                                                                                                                                                                                                                                                                                                                                                                                                                                                                                                                                                                                                                        |
| Phosphatidylcholine (PC)              | C30:0 PC, C30:1 PC, C32:0 PC, C32:1 PC, C32:2 PC, C34:4 PC, C34:0 PC, C34:1 PC, C34:2 PC, C36:4 PC-A, C38:6 PC, C34:3 PC, C36:0 PC, C36:1 PC, C36:2 PC, C38:3 PC, C38:4 PC, C40:6 PC, C36:3 PC, C36:4 PC-B, C38:2 PC, C40:10 PC, C40:9 PC, C34:1 PC plasmalogen-A, C34:2 PC plasmalogen, C34:3 PC plasmalogen, C34:5 PC plasmalogen, C36:5 PC plasmalogen-B, C36:5 PC plasmalogen-A, C38:7 PC plasmalogen, C36:1 PC plasmalogen, C36:2 PC plasmalogen, C36:3 PC plasmalogen, C38:4 PC plasmalogen, C40:7 PC plasmalogen, C36:4 PC plasmalogen, C34:0 PE, C34:2 PE, C36:4 PE, C38:2 PE, C34:2 PE plasmalogen, C36:0 PE, C36:1 PE, C36:2 PE, C38:4 PE, C40:6 PE, C36:3 PE, C38:5 PE, C36:2 PE plasmalogen, C38:6 PE, C34:3 PE plasmalogen, C38:3 PE plasmalogen, C38:5 PE plasmalogen, C38:6 PE plasmalogen, C40:7 PE plasmalogen, C36:5 PE plasmalogen, C38:7 PE plasmalogen, C36:3 PE plasmalogen, C36:4 PE plasmalogen |
| Lysophosphatidylethanolamine (PE)     | C18:0 SM, C16:0 SM, C24:0 SM, C14:0 SM, C20:0 SM, C22:0 SM, C22:1 SM                                                                                                                                                                                                                                                                                                                                                                                                                                                                                                                                                                                                                                                                                                                                                                                                                                                    |
| Sphingomyeline (SM)                   | C48:0 TAG, C50:0 TAG, C48:1 TAG, C50:1 TAG, C52:4 TAG, C52:0 TAG, C52:1 TAG, C52:2 TAG, C54:4 TAG, C48:2 TAG, C50:2 TAG, C52:3 TAG, C54:5 TAG, C56:8 TAG, C54:1 TAG, C54:2 TAG, C56:2 TAG, C54:3 TAG, C56:5 TAG, C56:3 TAG, C58:8 TAG, C48:3 TAG, C50:3 TAG, C50:4 TAG, C52:6 TAG, C56:9 TAG, C56:6 TAG, C56:7 TAG, C58:9 TAG, C58:7 TAG, C60:12 TAG, C46:0 TAG, C46:1 TAG, C46:2 TAG, C50:5 TAG, C50:6 TAG, C54:9 TAG, C56:10 TAG, C52:7 TAG, C54:8 TAG, C58:11 TAG, C44:0 TAG                                                                                                                                                                                                                                                                                                                                                                                                                                         |
| Triacylglycerol (TAG)                 | N-carbamoyl-beta-alanine                                                                                                                                                                                                                                                                                                                                                                                                                                                                                                                                                                                                                                                                                                                                                                                                                                                                                                |
| $\beta$ -alanine derivative           | creatine                                                                                                                                                                                                                                                                                                                                                                                                                                                                                                                                                                                                                                                                                                                                                                                                                                                                                                                |
| Nitrogenous organic acid              | dimethylglycine                                                                                                                                                                                                                                                                                                                                                                                                                                                                                                                                                                                                                                                                                                                                                                                                                                                                                                         |
| Amino acid glycine derivative         | glycine, glutamate, tyrosine, phenylalanine, alanine, threonine, asparagine, isoleucine, histidine, lysine, serine, ornithine, arginine, glutamine, leucine, methionine, kynurenic acid, pipecolic acid, hydroxyproline, valine, citrulline, tryptophan                                                                                                                                                                                                                                                                                                                                                                                                                                                                                                                                                                                                                                                                 |
| Amino acid                            | taurine                                                                                                                                                                                                                                                                                                                                                                                                                                                                                                                                                                                                                                                                                                                                                                                                                                                                                                                 |
| organic compound, constituent of bile | allantoin                                                                                                                                                                                                                                                                                                                                                                                                                                                                                                                                                                                                                                                                                                                                                                                                                                                                                                               |
| Diureide of glyoxylic acid            | 1-methylnicotinamide                                                                                                                                                                                                                                                                                                                                                                                                                                                                                                                                                                                                                                                                                                                                                                                                                                                                                                    |
| Others                                | Metabolite of nicotinamide                                                                                                                                                                                                                                                                                                                                                                                                                                                                                                                                                                                                                                                                                                                                                                                                                                                                                              |
| Carboxylic acid of piperidine         | pipecolic acid                                                                                                                                                                                                                                                                                                                                                                                                                                                                                                                                                                                                                                                                                                                                                                                                                                                                                                          |
| TMAO                                  | trimethylamine-N-oxide                                                                                                                                                                                                                                                                                                                                                                                                                                                                                                                                                                                                                                                                                                                                                                                                                                                                                                  |
| Alkaloid found in tobacco             | cotinine                                                                                                                                                                                                                                                                                                                                                                                                                                                                                                                                                                                                                                                                                                                                                                                                                                                                                                                |
| Vitamin                               | niacinamide                                                                                                                                                                                                                                                                                                                                                                                                                                                                                                                                                                                                                                                                                                                                                                                                                                                                                                             |
| Modified nucleosides                  | 1-methyladenosine                                                                                                                                                                                                                                                                                                                                                                                                                                                                                                                                                                                                                                                                                                                                                                                                                                                                                                       |
| Ceramide                              | C16:0 Ceramide (d18:1), C22:0 Ceramide (d18:1), C24:0 Ceramide (d18:1)                                                                                                                                                                                                                                                                                                                                                                                                                                                                                                                                                                                                                                                                                                                                                                                                                                                  |
| Phosphatidylserine                    | C40:6 PS, C34:0 PS, C34:0 PI                                                                                                                                                                                                                                                                                                                                                                                                                                                                                                                                                                                                                                                                                                                                                                                                                                                                                            |
| N-monomethyl-L-arginine               | NMMA                                                                                                                                                                                                                                                                                                                                                                                                                                                                                                                                                                                                                                                                                                                                                                                                                                                                                                                    |

**Table S2. HMDB IDs and metabolite names.**

| HMDB      | METABOLITE               |
|-----------|--------------------------|
| HMDB00026 | N-carbamoyl-beta-alanine |
| HMDB00062 | carnitine                |
| HMDB00064 | creatine                 |
| HMDB00092 | dimethylglycine          |
| HMDB00123 | glycine                  |
| HMDB00148 | glutamate                |
| HMDB00158 | tyrosine                 |
| HMDB00159 | phenylalanine            |
| HMDB00161 | alanine                  |
| HMDB00167 | threonine                |
| HMDB00168 | asparagine               |
| HMDB00172 | isoleucine               |
| HMDB00177 | histidine                |
| HMDB00182 | lysine                   |
| HMDB00187 | serine                   |
| HMDB00201 | C2 carnitine             |
| HMDB00214 | ornithine                |
| HMDB00222 | C16 carnitine            |
| HMDB00251 | taurine                  |
| HMDB00252 | sphingosine              |
| HMDB00462 | allantoin                |
| HMDB00517 | arginine                 |
| HMDB00610 | C18:2 CE                 |
| HMDB00641 | glutamine                |
| HMDB00651 | C10 carnitine            |
| HMDB00658 | C16:1 CE                 |
| HMDB00687 | leucine                  |
| HMDB00688 | C5 carnitine             |
| HMDB00696 | methionine               |
| HMDB00699 | 1-methylnicotinamide     |
| HMDB00705 | C6 carnitine             |
| HMDB00715 | kynurenic acid           |
| HMDB00716 | pipecolic acid           |
| HMDB00725 | hydroxyproline           |
| HMDB00791 | C8 carnitine             |
| HMDB00824 | C3 carnitine             |
| HMDB00848 | C18 carnitine            |
| HMDB00883 | valine                   |
| HMDB00885 | C16:0 CE                 |
| HMDB00904 | citrulline               |
| HMDB00918 | C18:1 CE                 |
| HMDB00925 | trimethylamine-N-oxide   |
| HMDB00929 | tryptophan               |
| HMDB01046 | cotinine                 |
| HMDB01348 | C18:0 SM                 |
| HMDB01406 | niacinamide              |
| HMDB02013 | C4 carnitine             |
| HMDB02014 | C14:1 carnitine          |
| HMDB02250 | C12 carnitine            |
| HMDB02366 | C5:1 carnitine           |
| HMDB02815 | C18:1 LPC                |
| HMDB03331 | 1-methyladenosine        |
| HMDB04949 | C16:0 Ceramide (d18:1)   |
| HMDB04952 | C22:0 Ceramide (d18:1)   |
| HMDB04956 | C24:0 Ceramide (d18:1)   |
| HMDB05065 | C18:1 carnitine          |

|           |                 |
|-----------|-----------------|
| HMDB05066 | C14 carnitine   |
| HMDB05356 | C48:0 TAG       |
| HMDB05357 | C50:0 TAG       |
| HMDB05359 | C48:1 TAG       |
| HMDB05360 | C50:1 TAG       |
| HMDB05363 | C52:4 TAG       |
| HMDB05365 | C52:0 TAG       |
| HMDB05367 | C52:1 TAG       |
| HMDB05369 | C52:2 TAG       |
| HMDB05370 | C54:4 TAG       |
| HMDB05376 | C48:2 TAG       |
| HMDB05377 | C50:2 TAG       |
| HMDB05384 | C52:3 TAG       |
| HMDB05385 | C54:5 TAG       |
| HMDB05392 | C56:8 TAG       |
| HMDB05395 | C54:1 TAG       |
| HMDB05403 | C54:2 TAG       |
| HMDB05404 | C56:2 TAG       |
| HMDB05405 | C54:3 TAG       |
| HMDB05406 | C56:5 TAG       |
| HMDB05410 | C56:3 TAG       |
| HMDB05413 | C58:8 TAG       |
| HMDB05432 | C48:3 TAG       |
| HMDB05433 | C50:3 TAG       |
| HMDB05435 | C50:4 TAG       |
| HMDB05436 | C52:6 TAG       |
| HMDB05448 | C56:9 TAG       |
| HMDB05456 | C56:6 TAG       |
| HMDB05462 | C56:7 TAG       |
| HMDB05463 | C58:9 TAG       |
| HMDB05471 | C58:7 TAG       |
| HMDB05478 | C60:12 TAG      |
| HMDB06347 | C26 carnitine   |
| HMDB06469 | C18:2 carnitine |
| HMDB06725 | C14:0 CE        |
| HMDB06726 | C20:4 CE        |
| HMDB06731 | C20:5 CE        |
| HMDB06733 | C22:6 CE        |
| HMDB06736 | C20:3 CE        |
| HMDB07011 | C30:0 DAG       |
| HMDB07098 | C32:0 DAG       |
| HMDB07099 | C32:1 DAG       |
| HMDB07102 | C34:1 DAG       |
| HMDB07103 | C34:2 DAG       |
| HMDB07128 | C32:2 DAG       |
| HMDB07132 | C34:3 DAG       |
| HMDB07199 | C38:5 DAG       |
| HMDB07216 | C36:1 DAG       |
| HMDB07218 | C36:2 DAG       |
| HMDB07219 | C36:3 DAG       |
| HMDB07248 | C36:4 DAG       |
| HMDB07869 | C30:0 PC        |
| HMDB07870 | C30:1 PC        |
| HMDB07871 | C32:0 PC        |
| HMDB07873 | C32:1 PC        |
| HMDB07874 | C32:2 PC        |
| HMDB07883 | C34:4 PC        |
| HMDB07970 | C34:0 PC        |

|           |                        |
|-----------|------------------------|
| HMDB07972 | C34:1 PC               |
| HMDB07973 | C34:2 PC               |
| HMDB07983 | C36:4 PC-A             |
| HMDB07991 | C38:6 PC               |
| HMDB08006 | C34:3 PC               |
| HMDB08036 | C36:0 PC               |
| HMDB08038 | C36:1 PC               |
| HMDB08039 | C36:2 PC               |
| HMDB08047 | C38:3 PC               |
| HMDB08048 | C38:4 PC               |
| HMDB08057 | C40:6 PC               |
| HMDB08105 | C36:3 PC               |
| HMDB08138 | C36:4 PC-B             |
| HMDB08270 | C38:2 PC               |
| HMDB08511 | C40:10 PC              |
| HMDB08731 | C40:9 PC               |
| HMDB08925 | C34:0 PE               |
| HMDB08928 | C34:2 PE               |
| HMDB08937 | C36:4 PE               |
| HMDB08942 | C38:2 PE               |
| HMDB08952 | C34:2 PE plasmalogen   |
| HMDB08991 | C36:0 PE               |
| HMDB08993 | C36:1 PE               |
| HMDB08994 | C36:2 PE               |
| HMDB09003 | C38:4 PE               |
| HMDB09012 | C40:6 PE               |
| HMDB09060 | C36:3 PE               |
| HMDB09069 | C38:5 PE               |
| HMDB09082 | C36:2 PE plasmalogen   |
| HMDB09102 | C38:6 PE               |
| HMDB09805 | C34:0 PI               |
| HMDB10167 | C40:6 PS               |
| HMDB10169 | C16:0 SM               |
| HMDB10368 | C18:0 CE               |
| HMDB10370 | C18:3 CE               |
| HMDB10375 | C22:5 CE               |
| HMDB10379 | C14:0 LPC              |
| HMDB10382 | C16:0 LPC              |
| HMDB10383 | C16:1 LPC              |
| HMDB10384 | C18:0 LPC              |
| HMDB10386 | C18:2 LPC              |
| HMDB10395 | C20:4 LPC              |
| HMDB10397 | C20:5 LPC              |
| HMDB10404 | C22:6 LPC              |
| HMDB10411 | C46:0 TAG              |
| HMDB10412 | C46:1 TAG              |
| HMDB10419 | C46:2 TAG              |
| HMDB10471 | C50:5 TAG              |
| HMDB10497 | C50:6 TAG              |
| HMDB10498 | C54:9 TAG              |
| HMDB10513 | C56:10 TAG             |
| HMDB10517 | C52:7 TAG              |
| HMDB10518 | C54:8 TAG              |
| HMDB10531 | C58:11 TAG             |
| HMDB11130 | C18:0 LPE              |
| HMDB11208 | C34:1 PC plasmalogen-A |
| HMDB11210 | C34:2 PC plasmalogen   |
| HMDB11211 | C34:3 PC plasmalogen   |

|           |                        |
|-----------|------------------------|
| HMDB11214 | C34:5 PC plasmalogen   |
| HMDB11220 | C36:5 PC plasmalogen-B |
| HMDB11221 | C36:5 PC plasmalogen-A |
| HMDB11229 | C38:7 PC plasmalogen   |
| HMDB11241 | C36:1 PC plasmalogen   |
| HMDB11243 | C36:2 PC plasmalogen   |
| HMDB11244 | C36:3 PC plasmalogen   |
| HMDB11252 | C38:4 PC plasmalogen   |
| HMDB11294 | C40:7 PC plasmalogen   |
| HMDB11310 | C36:4 PC plasmalogen   |
| HMDB11343 | C34:3 PE plasmalogen   |
| HMDB11384 | C38:3 PE plasmalogen   |
| HMDB11386 | C38:5 PE plasmalogen   |
| HMDB11387 | C38:6 PE plasmalogen   |
| HMDB11394 | C40:7 PE plasmalogen   |
| HMDB11410 | C36:5 PE plasmalogen   |
| HMDB11420 | C38:7 PE plasmalogen   |
| HMDB11441 | C36:3 PE plasmalogen   |
| HMDB11442 | C36:4 PE plasmalogen   |
| HMDB11503 | C16:0 LPE              |
| HMDB11506 | C18:1 LPE              |
| HMDB11507 | C18:2 LPE              |
| HMDB11517 | C20:4 LPE              |
| HMDB11526 | C22:6 LPE              |
| HMDB11697 | C24:0 SM               |
| HMDB12097 | C14:0 SM               |
| HMDB12102 | C20:0 SM               |
| HMDB12103 | C22:0 SM               |
| HMDB12104 | C22:1 SM               |
| HMDB12356 | C34:0 PS               |
| HMDB13127 | C4-OH carnitine        |
| HMDB13130 | C5-DC carnitine        |
| HMDB13238 | C7 carnitine           |
| HMDB13288 | C9 carnitine           |
| HMDB13325 | C10:2 carnitine        |
| HMDB13326 | C12:1 carnitine        |
| HMDB13331 | C14:2 carnitine        |
| HMDB29416 | NMMA                   |
| HMDB42063 | C44:0 TAG              |

---



Figure S1. Flow chart of current study.

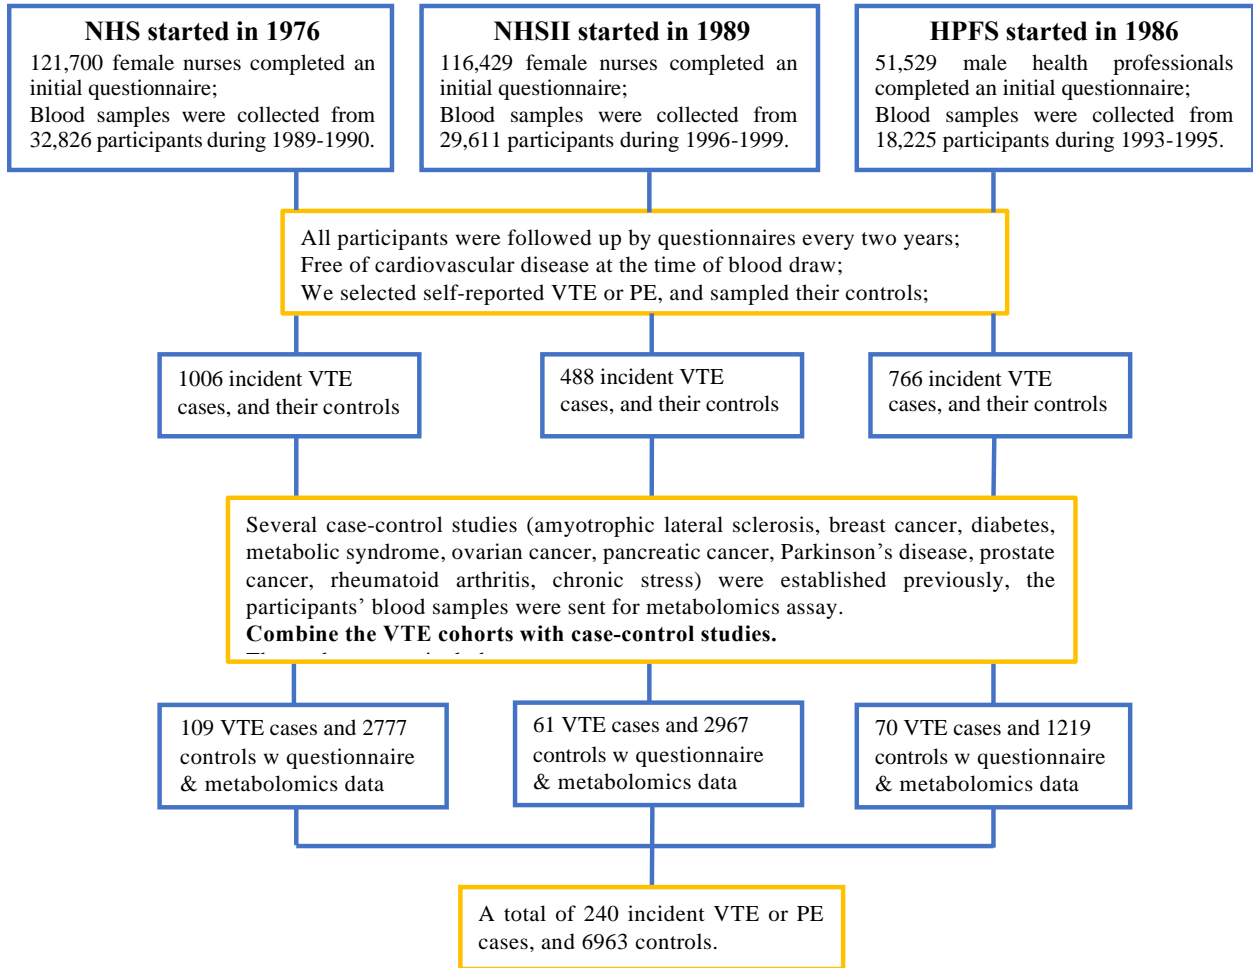

Supplement: JAH3-7-e010317-s001.pdf [file JAH3-7-e010317-s001.pdf]
